# Supplementary material for: Repetitive transcranial magnetic stimulation over primary motor vs non-motor cortical targets; effects on experimental hyperalgesia in healthy subjects
Source: Springer Nature journal article supplement (doi:10.1186/s12883-014-0166-3), 2014-09-03
Supplement: MOESM1 [file 9742022]

|                          | <b>PRE-CAP</b> |            |            |              | <b>POST-TMS</b> |            |            |              |
|--------------------------|----------------|------------|------------|--------------|-----------------|------------|------------|--------------|
|                          | <i>NO TMS</i>  | <i>OCC</i> | <i>MI</i>  | <i>DLFPC</i> | <i>NO TMS</i>   | <i>OCC</i> | <i>MI</i>  | <i>DLFPC</i> |
| <b><i>CDT (°C)</i></b>   | 30.3 (0.3)     | 29.9 (0.5) | 29.7 (0.4) | 29.9 (0.4)   | 30.1 (0.4)      | 29.7 (0.4) | 29.5 (0.4) | 29.2 (0.5)   |
| <b><i>WDT (°C)</i></b>   | 34.3 (0.3)     | 34.7 (0.4) | 34.1 (0.3) | 34.8 (0.5)   | 34.5 (0.4)      | 34.8 (0.4) | 34.3 (0.4) | 34.9 (0.5)   |
| <b><i>CPT (°C)</i></b>   | 19.4 (2.1)     | 17.0 (2.0) | 15.3 (2.2) | 15.3 (2.2)   | 15.9 (2.8)      | 17.5 (2.1) | 14.8 (1.9) | 15.3 (2.3)   |
| <b><i>HPT (°C)</i></b>   | 42.6 (0.8)     | 44.1 (0.9) | 43.6 (1.0) | 43.6 (0.9)   | 42.8 (1.0)      | 43.4 (0.9) | 43.6 (0.9) | 43.2 (1.0)   |
| <b><i>HYP- (NRS)</i></b> | 2.1 (0.3)      | 1.6 (0.3)  | 1.8 (0.3)  | 1.6 (0.3)    | 1.8 (0.2)       | 1.8 (0.2)  | 1.5 (0.2)  | 1.5 (0.2)    |
| <b><i>HYP0 (NRS)</i></b> | 3.6 (0.4)      | 3.1 (0.5)  | 3.1 (0.5)  | 2.7 (0.3)    | 3.8 (0.5)       | 2.9 (0.4)  | 2.7 (0.3)  | 2.4 (0.4)    |
| <b><i>HYP+ (NRS)</i></b> | 5.9 (0.6)      | 5.3 (0.6)  | 5.2 (0.6)  | 5.2 (0.4)    | 6.1 (0.6)       | 5.1 (0.5)  | 5.2 (0.6)  | 4.5 (0.6)    |

Supp Table 1 QST and heat hyperalgesia (HYP) responses for the near capsaicin (nrCAP) site at baseline and post combined capsaicin/rTMS treatment (CST=cold sensory threshold; HST=heat sensory threshold; CPT=cold pain threshold; HPT=heat pain threshold; HYP- = HPT – 2.5°C; HYP0 =HPT; HYP+ = HPT +2.5°C) (Mean/SEM)

|                          | <b>PRE-CAP</b> |            |            |              | <b>POST-TMS</b> |            |            |              |
|--------------------------|----------------|------------|------------|--------------|-----------------|------------|------------|--------------|
|                          | <i>NO TMS</i>  | <i>OCC</i> | <i>MI</i>  | <i>DLFPC</i> | <i>NO TMS</i>   | <i>OCC</i> | <i>MI</i>  | <i>DLFPC</i> |
| <b><i>CDT</i></b> (°C)   | 30.3 (0.2)     | 29.7 (0.4) | 30.1 (0.3) | 30.1 (0.3)   | 30.2 (0.3)      | 30.3 (0.3) | 30.1 (0.4) | 29.3 (0.6)   |
| <b><i>WDT</i></b> (°C)   | 34.1 (0.2)     | 35 (0.6)   | 34.7 (0.4) | 34.2 (0.4)   | 33.9 (0.2)      | 34.7 (0.4) | 34.3 (0.5) | 34.7 (0.5)   |
| <b><i>CPT</i></b> (°C)   | 18.8 (1.8)     | 18.6 (1.8) | 17.2 (1.9) | 19.0 (1.8)   | 17.9 (2.0)      | 15.3 (1.8) | 14.6 (2.1) | 16.9 (2.0)   |
| <b><i>HPT</i></b> (°C)   | 41.9 (1.0)     | 43.6 (0.9) | 43.7 (0.8) | 43.4 (0.7)   | 42.3 (0.8)      | 43.7 (0.8) | 44.3 (0.7) | 44.5 (0.7)   |
| <b><i>HYP-</i></b> (NRS) | 2.1 (0.3)      | 1.6 (0.2)  | 1.3 (0.2)  | 1.5 (0.3)    | 1.9 (0.3)       | 1.5 (0.2)  | 1.5 (0.3)  | 1.2 (0.2)    |
| <b><i>HYP0</i></b> (NRS) | 3.9 (0.4)      | 2.9 (0.3)  | 3.1 (0.4)  | 2.8 (0.4)    | 3.2 (0.4)       | 2.3 (0.3)  | 3.0 (0.5)  | 2.3 (0.4)    |
| <b><i>HYP+</i></b> (NRS) | 6.3 (0.4)      | 5.5 (0.5)  | 5.4 (0.5)  | 4.9 (0.5)    | 5.5 (0.4)       | 4.6 (0.4)  | 5.8 (0.7)  | 5.2 (0.5)    |

Supp Table 2 QST and heat hyperalgesia (HYP) responses for the contralateral capsaicin (clCAP) site at baseline and post combined capsaicin/rTMS treatment (CST=cold sensory threshold; HST=heat sensory threshold; CPT=cold pain threshold; HPT=heat pain threshold; HYP- = HPT – 2.5°C; HYP0 =HPT; HYP+ = HPT +2.5°C) (Mean/SEM)

|                                           | <b>PRE-TMS</b>  |                 |                 |                 | <b>POST-TMS</b> |                 |                 |                 |
|-------------------------------------------|-----------------|-----------------|-----------------|-----------------|-----------------|-----------------|-----------------|-----------------|
|                                           | <i>NO TMS</i>   | <i>OCC</i>      | <i>MI</i>       | <i>DLFPC</i>    | <i>NO TMS</i>   | <i>OCC</i>      | <i>MI</i>       | <i>DLFPC</i>    |
| <b><i>POSITIVE AFFECT Mean(SEM)</i></b>   | 28.36<br>(2.44) | 26.64<br>(3.08) | 24.85<br>(2.69) | 24.14<br>(3.21) | 26.78<br>(3.57) | 25.93<br>(3.17) | 28.00<br>(2.93) | 24.93<br>(3.44) |
| <b><i>NEGATIVE AFFECT Median(IQR)</i></b> | 12.50<br>(3.50) | 11.00<br>(2.25) | 10.00<br>(1.25) | 10.00<br>(6.00) | 12.00<br>(3.50) | 11.00<br>(3.25) | 10.00<br>(6.00) | 10.00<br>(5.50) |

Suppl Table 3 Pre and post positive and negative affect scores in the control and TMS conditions (Mean/SEM)

|                             | <i>NO TMS</i>   | <i>OCC</i>      | <i>MI</i>       | <i>DLFPC</i>    | <i>F*</i> |
|-----------------------------|-----------------|-----------------|-----------------|-----------------|-----------|
| <b><i>Rumination</i></b>    | 7.93<br>(1.14)  | 6.14<br>(1.38)  | 5.64<br>(1.14)  | 6.14<br>(1.23)  | .673      |
| <b><i>Magnification</i></b> | 5.07<br>(1.23)  | 3.36<br>(.78)   | 3.43<br>(.74)   | 3.21<br>(.73)   | .719      |
| <b><i>Helplessness</i></b>  | 8.86<br>(1.95)  | 6.5<br>(1.61)   | 5.93<br>(1.25)  | 6.07<br>(1.55)  | .945      |
| <b><i>Total PCS</i></b>     | 21.85<br>(4.16) | 16.00<br>(3.63) | 14.71<br>(2.85) | 15.43<br>(3.38) | .860      |

Supplementary Table 4 Pain Catastrophising Scale (PCS) scores in the control and TMS conditions (Mean/SEM)

\*  $df_{(3,55)}$ ,  $p > .05$
